# Supplementary material for: Homodimerized cytoplasmic domain of PD-L1 regulates its complex glycosylation in living cells
Source: PubMed Central journal article supplement (PMC9427764; doi:10.1038/s42003-022-03845-4), 2022-08-30
Supplement: 42003_2022_3845_MOESM2_ESM.pdf [file 42003_2022_3845_MOESM2_ESM.pdf]

## Description of Additional Supplementary Files

**File name:** Supplementary Data 1

**Description:** Source data for Figure 6e and Figure 7d.
